# Supplementary material for: Nordihydroguaiaretic acid impairs prostate cancer cell migration and tumor metastasis by suppressing neuropilin 1
Source: PubMed Central journal article supplement (PMC5349909; doi:10.18632/oncotarget.13368), 2016-11-15
Supplement: oncotarget-07-86225-s001.pdf [file oncotarget-07-86225-s001.pdf]

## Nordihydroguaiaretic acid impairs prostate cancer cell migration and tumor metastasis by suppressing neuropilin 1

### Supplementary Materials

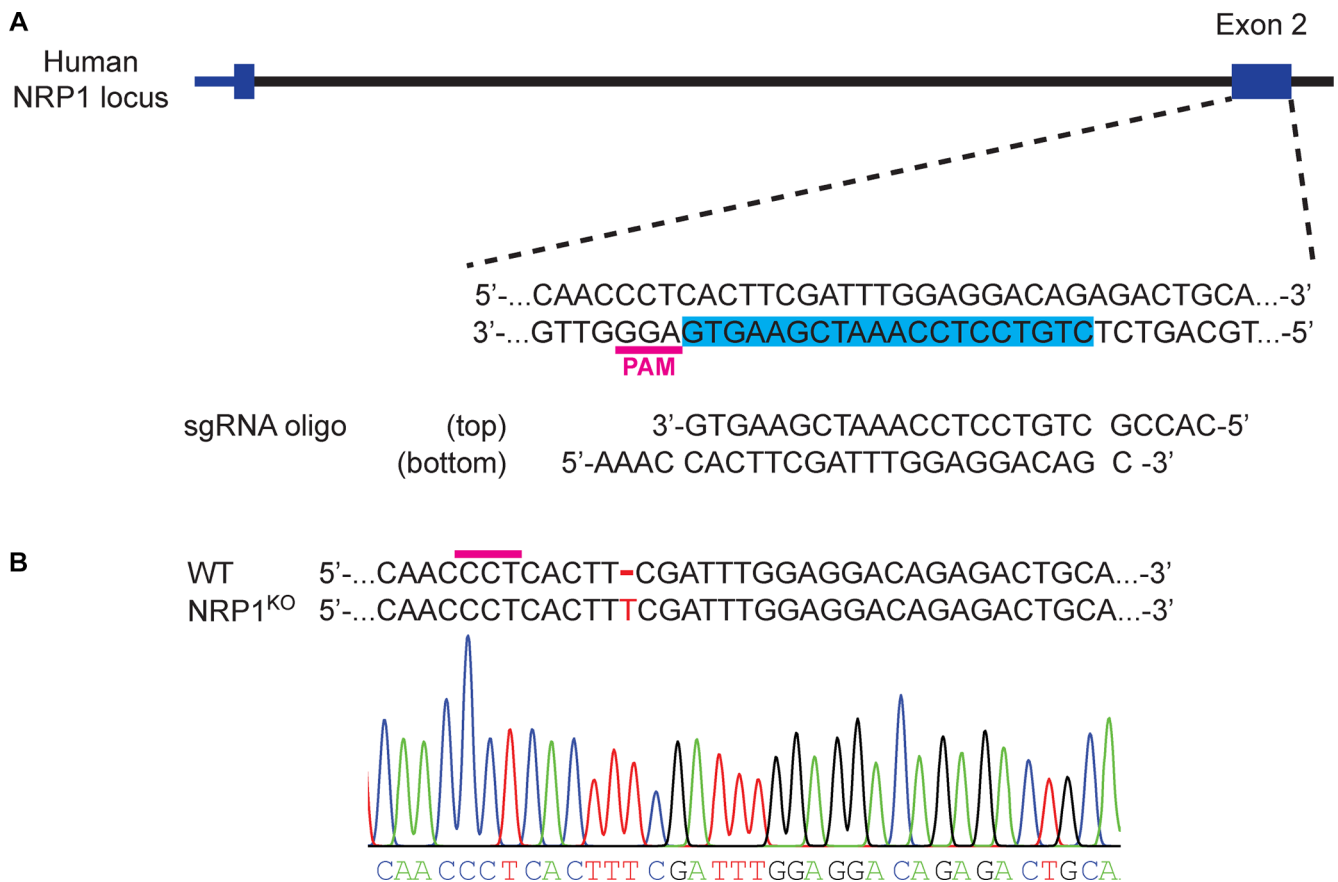

**Supplementary Figure S1: CRISPR-Cas9 mediated NRP1 knockout.** (A) The exon 2 of human NRP1 gene was targeted and the sequences of sgRNAs (top and bottom) are shown. (B) The DNA base pairs adjacent to the supposed double strands break site was sequenced. A 1bp insertion was induced in exon 2 leading to frameshift of NRP1 coding sequence.

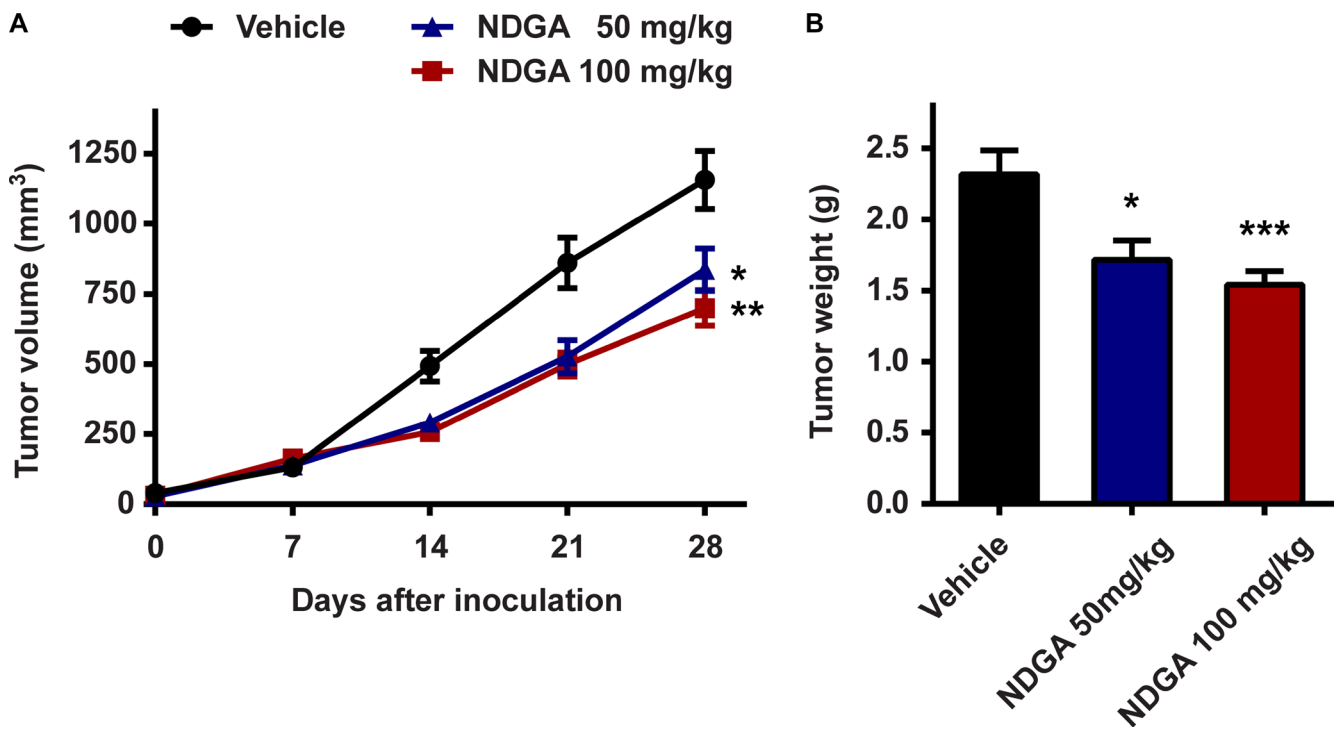

**Supplementary Figure S2: The effects of NDGA on tumor growth in subcutaneous xenograft model.** (A) Nude mice were subcutaneously injected with PC3 cells and orally administrated with vehicle, 50 mg/kg NDGA or 100 mg/kg NDGA. Tumor volume was measured at indicated times and calculated as  $V = (\text{width}^2 \times \text{length})/2$ . Data show mean  $\pm$  S.E ( $n = 5$ ). \* $p < 0.05$ , \*\* $p < 0.01$ . (B) Tumor weight was measured at the endpoint of experiment. Data show mean  $\pm$  S.E ( $n = 5$ ). \* $p < 0.05$ , \*\*\* $p < 0.001$ .

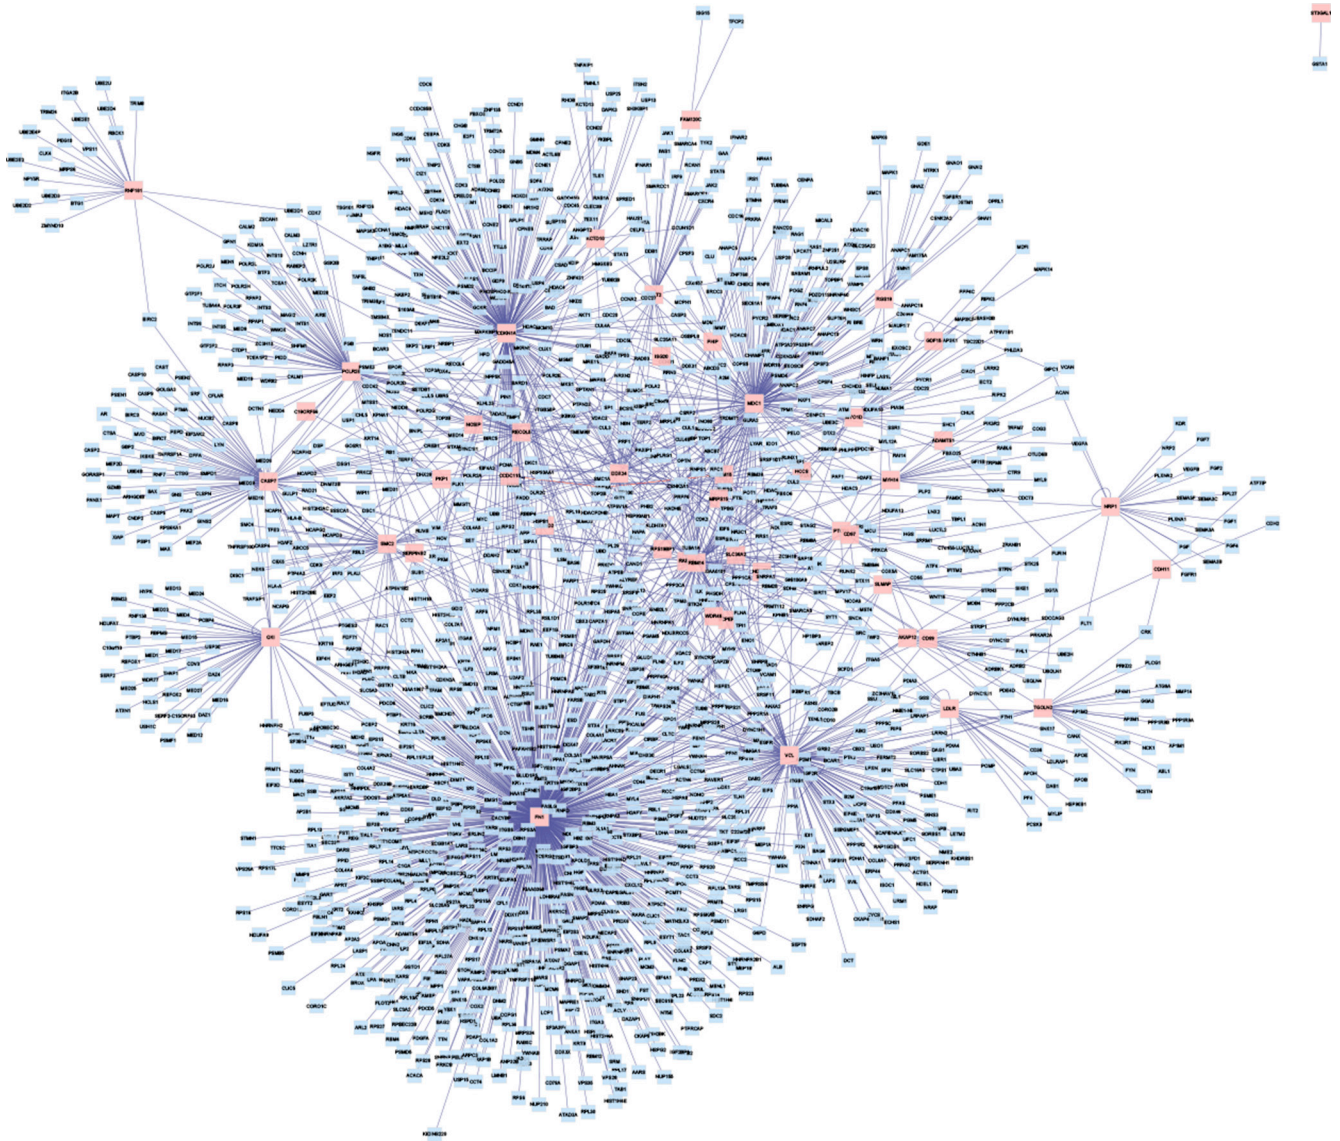

Supplementary Material S1: The details of protein-protein interaction network

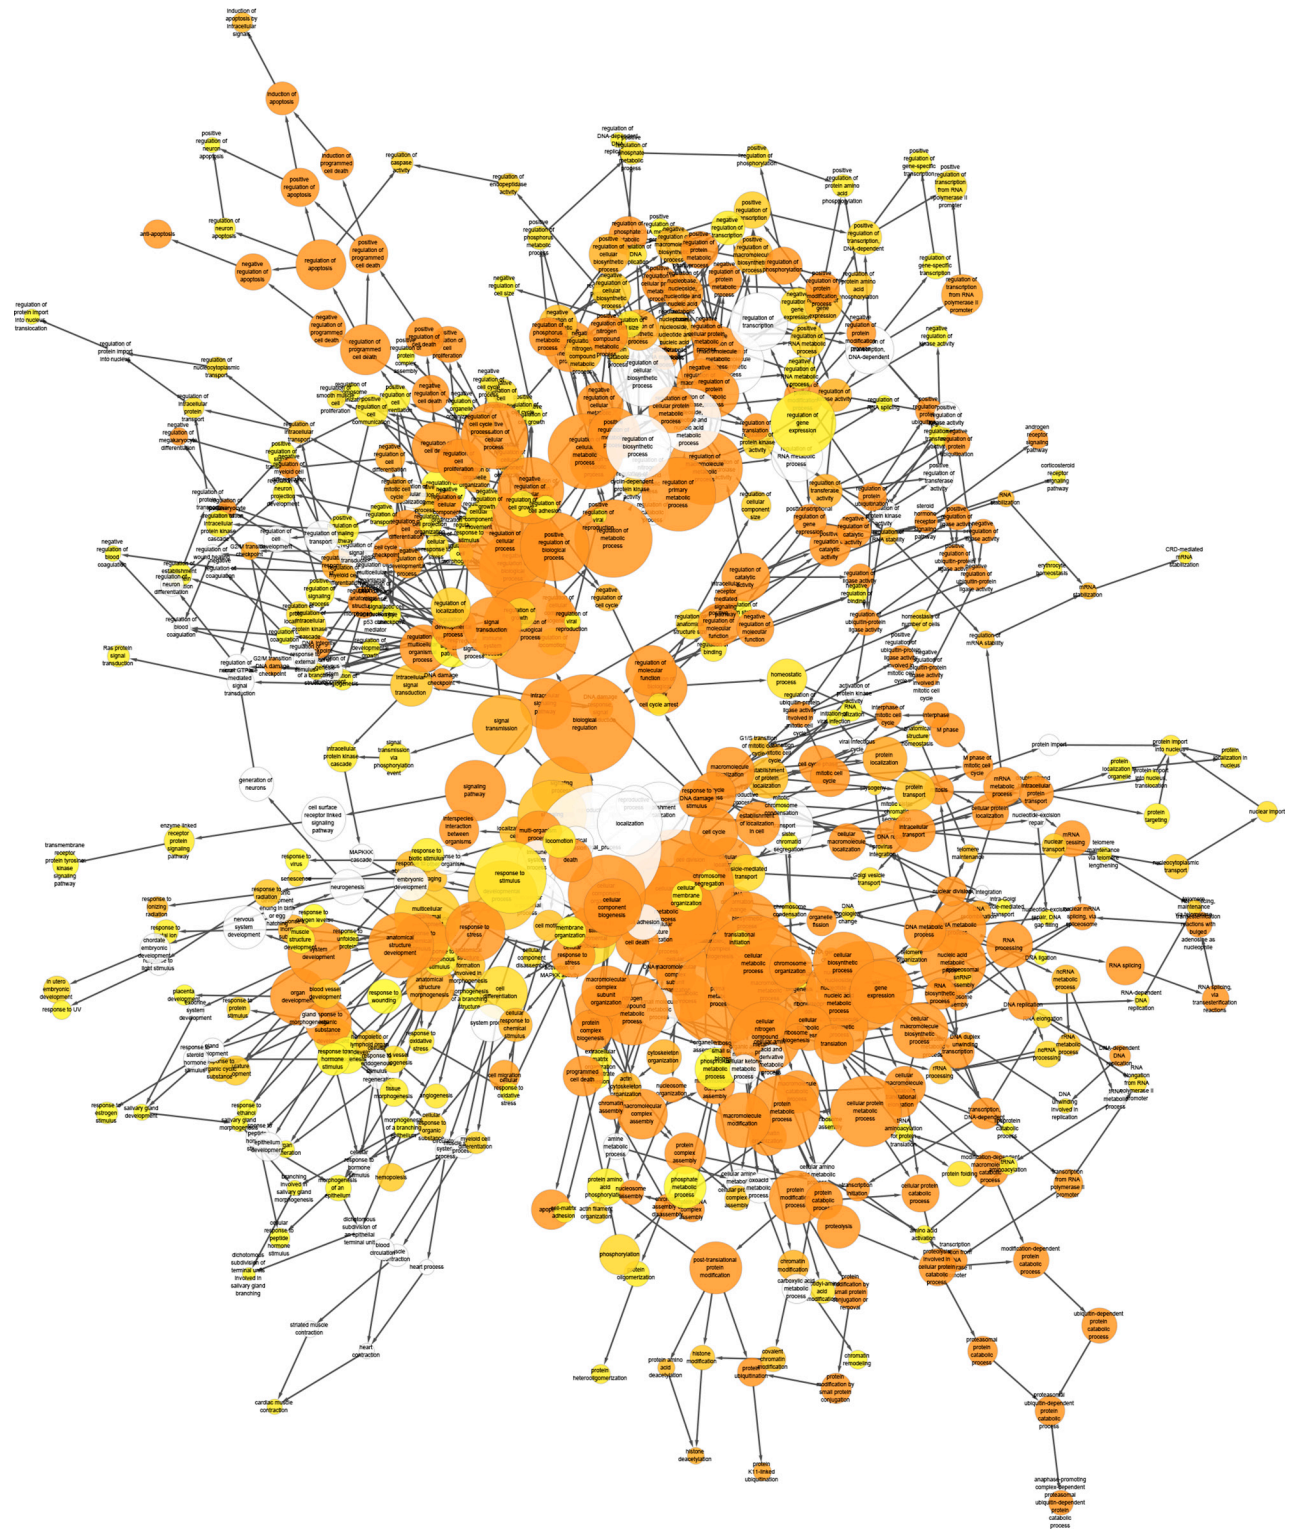

Supplementary Material S2: The details of Gene Ontology analysis

**Supplementary Table S1: Result of proteomic assay.** See [Supplementary\\_Table\\_S1](#)

**Supplementary Table S2: Details of GO analysis.** See [Supplementary\\_Table\\_S2](#)
